# Supplementary material for: Alkyl Levulinates and 2-Methyltetrahydrofuran: Possible Biomass-Based Solvents in Palladium-Catalyzed Aminocarbonylation
Source: MDPI journal article supplement (doi:10.3390/molecules28010442), 2023-01-03
Supplement: s1 [file s1]

## Supporting Information

### Alkyl Levulinate and 2-Methyltetrahydrofuran: Possible Biomass-Based Solvents in Palladium-Catalyzed Aminocarbonylation

Nuray Uzunlu <sup>1</sup>, Péter Pongrácz <sup>1</sup>, László Kollár <sup>1, 2, 3</sup> and Attila Takács <sup>1, 2,\*</sup>

<sup>1</sup> Department of General and Inorganic Chemistry, University of Pécs, Ifjúság útja 6., H-7624 Pécs, Hungary

<sup>2</sup> János Szentágothai Research Centre, University of Pécs, Ifjúság útja 20., H-7624 Pécs, Hungary

<sup>3</sup> ELKH-PTE Research Group for Selective Chemical Syntheses, Ifjúság útja 6., H-7624 Pécs, Hungary

\*Correspondence: [takacsattila@gamma.ttk.pte.hu](mailto:takacsattila@gamma.ttk.pte.hu)

#### Contents

#### I. Conversions determined by GC

**Table S1:** Optimization study of the aminocarbonylation of iodobenzene (**1**) with morpholine (**a**).

**Table S2:** Palladium-catalyzed aminocarbonylation of iodobenzene (**1**) with different primary and secondary amines (**b-h**).

**Table S3:** Palladium-catalyzed aminocarbonylation of *para*-substituted iodobenzene derivatives (**2-9**) with morpholine (**a**).

**Table S4:** Palladium-catalyzed aminocarbonylation of substituted iodobenzenes (**10-14**) with morpholine (**a**).

**Table S5:** Palladium-catalyzed aminocarbonylation of iodoheteroaromatic substrates (**15-19**) with morpholine (**a**)

#### II. MS data set of the products

**Table S6:** Palladium-catalyzed aminocarbonylation of iodobenzene (**1**) with different primary and secondary amines (**a-h**).

**Table S7:** Palladium-catalyzed aminocarbonylation of *para*-substituted iodobenzene derivatives (**2-9**) with morpholine (**a**).

**Table S8:** Palladium-catalyzed aminocarbonylation of substituted iodobenzenes (**10-14**) with morpholine (**a**).

**Table S9:** Palladium-catalyzed aminocarbonylation of iodoheteroaromatic substrates (**15-19**) with morpholine (**a**)

**Table S1:** Optimization study of the aminocarbonylation of iodobenzene (**1**) with morpholine (**a**)<sup>a)</sup>

|       | <b>1</b> | <b>a</b>         |       |         | <b>1aa</b> |                     | <b>1ab</b>                                       |           |
|-------|----------|------------------|-------|---------|------------|---------------------|--------------------------------------------------|-----------|
| Entry | Solvent  | Ligand           | Temp. | R. Time | pco        | Conv. <sup>b)</sup> | Ratio of the carbonylated products <sup>b)</sup> |           |
|       |          |                  |       |         |            |                     | Amide                                            | Ketoamide |
|       |          |                  | [°C]  | [h]     | [bar]      | [%]                 |                                                  |           |
| 1     | MetLev   | PPh <sub>3</sub> | 50    | 6       | 1          | 29                  | 59                                               | 41        |
| 2     | MetLev   | PPh <sub>3</sub> | 50    | 24      | 1          | 63                  | 65                                               | 35        |
| 3     | MetLev   | PPh <sub>3</sub> | 70    | 6       | 1          | 62                  | 88                                               | 12        |
| 4     | MetLev   | PPh <sub>3</sub> | 70    | 24      | 1          | 86                  | 89                                               | 11        |
| 5     | MetLev   | PPh <sub>3</sub> | 50    | 6       | 40         | 63                  | 5                                                | 95        |
| 6     | MetLev   | PPh <sub>3</sub> | 50    | 24      | 40         | 79                  | 5                                                | 95        |
| 7     | MetLev   | XantPhos         | 50    | 6       | 1          | 99                  | 100                                              | 0         |
| 8     | MetLev   | XantPhos         | 50    | 24      | 1          | 100                 | 100                                              | 0         |
| 9     | EtLev    | PPh <sub>3</sub> | 50    | 6       | 1          | 46                  | 68                                               | 32        |
| 10    | EtLev    | PPh <sub>3</sub> | 50    | 24      | 1          | 76                  | 75                                               | 25        |
| 11    | EtLev    | PPh <sub>3</sub> | 70    | 6       | 1          | 69                  | 91                                               | 9         |
| 12    | EtLev    | PPh <sub>3</sub> | 70    | 24      | 1          | 90                  | 93                                               | 7         |
| 13    | EtLev    | PPh <sub>3</sub> | 50    | 6       | 35         | 78                  | 8                                                | 92        |
| 14    | EtLev    | PPh <sub>3</sub> | 50    | 24      | 35         | 90                  | 7                                                | 93        |
| 15    | EtLev    | XantPhos         | 50    | 6       | 1          | 98                  | 100                                              | 0         |
| 16    | EtLev    | XantPhos         | 50    | 24      | 1          | 100                 | 100                                              | 0         |
| 17    | 2-MeTHF  | PPh <sub>3</sub> | 50    | 6       | 1          | 9                   | 84                                               | 16        |
| 18    | 2-MeTHF  | PPh <sub>3</sub> | 50    | 24      | 1          | 11                  | 100                                              | 0         |
| 19    | 2-MeTHF  | PPh <sub>3</sub> | 70    | 6       | 1          | 20                  | 82                                               | 18        |
| 20    | 2-MeTHF  | PPh <sub>3</sub> | 70    | 24      | 1          | 66                  | 96                                               | 4         |
| 21    | 2-MeTHF  | PPh <sub>3</sub> | 50    | 6       | 40         | 31                  | 14                                               | 86        |
| 22    | 2-MeTHF  | PPh <sub>3</sub> | 50    | 24      | 40         | 35                  | 14                                               | 86        |
| 23    | 2-MeTHF  | XantPhos         | 50    | 6       | 1          | 87                  | 100                                              | 0         |
| 24    | 2-MeTHF  | XantPhos         | 50    | 24      | 1          | 100                 | 100                                              | 0         |

a) Reaction conditions: 0.5 mmol of iodobenzene, 0.75 mmol of morpholine, 0.0125 mmol of Pd(OAc)<sub>2</sub>, 0.025 mmol of PPh<sub>3</sub> or 0.0125 mmol of XantPhos, 0.25 mL of triethylamine and 5 mL of solvent under CO atmosphere.

b) The conversion and the ratio of the carbonylated products were determined by GC using dodecane as an internal standard.

**Table S2:** Palladium-catalyzed aminocarbonylation of iodobenzene (**1**) with different amines (**b-h**) <sup>a)</sup>

$$\text{Iodobenzene (1)} + \text{HNR'R'' (a)} \xrightarrow[\text{Et}_3\text{N} / \text{Solvent} / \text{CO}]{\text{Pd(OAc)}_2 / \text{Ligand}} \text{1aa} + \text{1ab}$$

50 °C

**HNR'R'':**

| Entry | Amines                                  | R. Time<br>[h] | p <sub>CO</sub><br>[bar] | Conv<br>[%] | Conv<br>[%] | Conv<br>[%] |
|-------|-----------------------------------------|----------------|--------------------------|-------------|-------------|-------------|
| 1     | <i>t</i> BuNH <sub>2</sub> ( <b>b</b> ) | 6              | 1                        | 92          | 99          | 35          |
| 2     | <i>t</i> BuNH <sub>2</sub> ( <b>b</b> ) | 24             | 1                        | 100         | 100         | 86          |
| 3     | Pyrrolidine ( <b>c</b> )                | 6              | 1                        | 100         | 100         | 100         |
| 4     | Pyrrolidine ( <b>c</b> )                | 24             | 1                        | 100         | 100         | 100         |
| 5     | Cyclohexylamine ( <b>d</b> )            | 6              | 1                        | 100         | 100         | 100         |
| 6     | Cyclohexylamine ( <b>d</b> )            | 24             | 1                        | 100         | 100         | 100         |
| 7     | Aniline ( <b>e</b> )                    | 6              | 1                        | 46          | 70          | 5           |
| 8     | Aniline ( <b>e</b> )                    | 24             | 1                        | 100         | 96          | 22          |
| 9     | AlaOMe ( <b>f</b> )                     | 6              | 1                        | 66          | 87          | 9           |
| 10    | AlaOMe ( <b>f</b> )                     | 24             | 1                        | 100         | 100         | 47          |
| 11    | ProOMe ( <b>g</b> )                     | 6              | 1                        | 84          | 90          | 6           |
| 12    | ProOMe ( <b>g</b> )                     | 24             | 1                        | 100         | 100         | 26          |
| 13    | 4-picolylamine ( <b>h</b> )             | 6              | 1                        | 66          | 95          | 100         |
| 14    | 4-picolylamine ( <b>h</b> )             | 24             | 1                        | 100         | 100         | 100         |

a) Reaction conditions: 0.5 mmol of iodobenzene, amine nucleophile (1.5 mmol of *tert*-butylamine, 0.75 mmol of pyrrolidine, 0.75 mmol of cyclohexylamine, 1.0 mmol of aniline, 0.55 mmol of amino acid methyl esters (AlaOMe, ProOMe), 0.75 mmol of 4-picolylamine), 0.0125 mmol of Pd(OAc)<sub>2</sub>, 0.0125 mmol of XantPhos, 0.25 mL of triethylamine and 5 mL of solvent at 50 °C under 1 bar of CO.

b) The conversion was determined by GC using dodecane as an internal standard.

**Table S3:** Palladium-catalyzed aminocarbonylation of *para*-substituted iodobenzene derivatives (**2-9**)<sup>a)</sup>

**2-9** + **a**  $\xrightarrow[\text{Et}_3\text{N} / \text{Solvent} / \text{CO}]{\text{Pd(OAc)}_2 / \text{XantPhos}, 50^\circ\text{C}}$  **2aa-9aa**

| Entry | Substrate                           | R. Time<br>[h] | pco<br>[bar] | Conv.<br>[%] | Conv.<br>[%] | Conv.<br>[%] |
|-------|-------------------------------------|----------------|--------------|--------------|--------------|--------------|
| 1     | 4-iodophenol ( <b>2</b> )           | 2              | 1            | 96           | 84           | 22           |
| 2     | 4-iodophenol ( <b>2</b> )           | 6              | 1            | 100          | 100          | 68           |
| 3     | 4-iodophenol ( <b>2</b> )           | 24             | 1            | -            | -            | 100          |
| 4     | 4-iodoanisole ( <b>3</b> )          | 2              | 1            | 76           | 46           | 10           |
| 5     | 4-iodoanisole ( <b>3</b> )          | 6              | 1            | 100          | 92           | 35           |
| 6     | 4-iodoanisole ( <b>3</b> )          | 24             | 1            | -            | -            | 94           |
| 7     | 4-iodotoluene ( <b>4</b> )          | 2              | 1            | 89           | 67           | 68           |
| 8     | 4-iodotoluene ( <b>4</b> )          | 6              | 1            | 99           | 98           | 100          |
| 9     | 1-fluoro-4-iodobenzene ( <b>5</b> ) | 2              | 1            | 48           | 59           | 15           |
| 10    | 1-fluoro-4-iodobenzene ( <b>5</b> ) | 6              | 1            | 98           | 91           | 44           |
| 11    | 1-fluoro-4-iodobenzene ( <b>5</b> ) | 24             | 1            | -            | -            | 100          |
| 12    | 1-bromo-4-iodobenzene ( <b>6</b> )  | 2              | 1            | 57           | 46           | 11           |
| 13    | 1-bromo-4-iodobenzene ( <b>6</b> )  | 6              | 1            | 98           | 100          | 32           |
| 14    | 1-bromo-4-iodobenzene ( <b>6</b> )  | 24             | 1            | -            | -            | 92           |
| 15    | methyl 4-iodo-benzoate ( <b>7</b> ) | 2              | 1            | 82           | 66           | 45           |
| 16    | methyl 4-iodo-benzoate ( <b>7</b> ) | 6              | 1            | 100          | 99           | 100          |
| 17    | 4-iodobenzotrifluoride ( <b>8</b> ) | 2              | 1            | 58           | 67           | 11           |
| 18    | 4-iodobenzotrifluoride ( <b>8</b> ) | 6              | 1            | 100          | 97           | 24           |
| 19    | 4-iodobenzotrifluoride ( <b>8</b> ) | 24             | 1            | -            | -            | 78           |
| 20    | 4-iodobenzonitrile ( <b>9</b> )     | 2              | 1            | 67           | 55           | 13           |
| 21    | 4-iodobenzonitrile ( <b>9</b> )     | 6              | 1            | 100          | 100          | 39           |
| 22    | 4-iodobenzonitrile ( <b>9</b> )     | 24             | 1            | -            | -            | 100          |

a) Reaction conditions: 0.5 mmol of *para*-substituted iodobenzene, 0.75 mmol of morpholine, 0.0125 mmol of Pd(OAc)<sub>2</sub>, 0.0125 mmol of XantPhos, 0.25 mL of triethylamine and 5 mL of solvent under 1 bar of CO

b) The conversion was determined by GC using dodecane as an internal standard.

**Table S4:** Palladium-catalyzed aminocarbonylation of substituted iodobenzenes (**10-14**) with morpholine (**a**)<sup>a)</sup>

| Entry | Substrate                                            | R. Time | pco   | Conv. | Conv. | Conv. |
|-------|------------------------------------------------------|---------|-------|-------|-------|-------|
|       |                                                      | [h]     | [bar] | [%]   | [%]   | [%]   |
| 1     | 2-iodoanisole ( <b>10</b> )                          | 2       | 1     | 36    | 31    | 17    |
| 2     | 2-iodoanisole ( <b>10</b> )                          | 6       | 1     | 57    | 60    | 33    |
| 3     | 2-iodoanisole ( <b>10</b> )                          | 23      | 1     | 83    | 80    | 58    |
| 4     | 2-iodoanisole ( <b>10</b> )                          | 48      | 1     | 84    | 80    | 63    |
| 5     | 3-iodotoluene ( <b>11</b> )                          | 2       | 1     | 55    | 49    | 9     |
| 6     | 3-iodotoluene ( <b>11</b> )                          | 6       | 1     | 96    | 94    | 26    |
| 7     | 3-iodotoluene ( <b>11</b> )                          | 24      | 1     | -     | 100   | 97    |
| 8     | 3-iodobenzonitrile ( <b>12</b> )                     | 2       | 1     | 33    | 36    | 6     |
| 9     | 3-iodobenzonitrile ( <b>12</b> )                     | 6       | 1     | 71    | 84    | 16    |
| 10    | 3-iodobenzonitrile ( <b>12</b> )                     | 23      | 1     | 100   | 99    | 60    |
| 11    | 3-iodobenzonitrile ( <b>12</b> )                     | 48      | 1     | -     | -     | 86    |
| 12    | 1-iodo-3,5-bis(trifluoromethyl)benzene ( <b>13</b> ) | 2       | 1     | 16    | 11    | 3     |
| 13    | 1-iodo-3,5-bis(trifluoromethyl)benzene ( <b>13</b> ) | 6       | 1     | 37    | 31    | 6     |
| 14    | 1-iodo-3,5-bis(trifluoromethyl)benzene ( <b>13</b> ) | 24      | 1     | 93    | 88    | 16    |
| 15    | 5-iodo-1,2,3-trimethoxybenzene ( <b>14</b> )         | 2       | 1     | 17    | 14    | 7     |
| 16    | 5-iodo-1,2,3-trimethoxybenzene ( <b>14</b> )         | 6       | 1     | 46    | 50    | 21    |
| 17    | 5-iodo-1,2,3-trimethoxybenzene ( <b>14</b> )         | 23      | 1     | 100   | 100   | 65    |
| 18    | 5-iodo-1,2,3-trimethoxybenzene ( <b>14</b> )         | 48      | 1     | -     | -     | 100   |

a) Reaction conditions: 0.5 mmol of substrate, 0.75 mmol of morpholine, 0.0125 mmol of Pd(OAc)<sub>2</sub>, 0.0125 mmol of XantPhos, 0.25 mL of triethylamine and 5 mL of solvent under 1 bar of CO.

b) The conversion was determined by GC using dodecane as an internal standard.

**Table S5:** Palladium-catalyzed aminocarbonylation of iodoheteroaromatic substrates (**15-19**) with morpholine (**a**)<sup>a)</sup>

$\text{HetAr-I} + \text{a} \xrightarrow[\text{Et}_3\text{N} / \text{Solvent} / \text{CO}]{\text{Pd(OAc)}_2 / \text{XantPhos}} \text{15aa-19aa} + [\text{Et}_3\text{N}] \cdot \text{HI}$ 
  
 50 °C

**15**      **16**      **17**      **18**      **19**

| Entry | Substrate                        | R. Time<br>[h] | pco<br>[bar] | Conv.<br>[%] | Conv.<br>[%] | Conv.<br>[%] |
|-------|----------------------------------|----------------|--------------|--------------|--------------|--------------|
| 1     | 2-iodopyridine ( <b>15</b> )     | 2              | 1            | 100          | 100          | 20           |
| 2     | 2-iodopyridine ( <b>15</b> )     | 6              | 1            | -            | -            | 82           |
| 3     | 2-iodopyridine ( <b>15</b> )     | 24             | 1            | -            | -            | 100          |
| 4     | 3-iodopyridine ( <b>16</b> )     | 2              | 1            | 43           | 47           | 11           |
| 5     | 3-iodopyridine ( <b>16</b> )     | 6              | 1            | 88           | 92           | 36           |
| 6     | 3-iodopyridine ( <b>16</b> )     | 23             | 1            | 100          | 100          | 98           |
| 7     | 2-iodothiophene ( <b>17</b> )    | 2              | 1            | 60           | 82           | 5            |
| 8     | 2-iodothiophene ( <b>17</b> )    | 6              | 1            | 96           | 97           | 7            |
| 9     | 2-iodothiophene ( <b>17</b> )    | 24             | 1            | -            | -            | 27           |
| 10    | 1-iodoisoquinoline ( <b>18</b> ) | 2              | 1            | 100          | 100          | 9            |
| 11    | 1-iodoisoquinoline ( <b>18</b> ) | 6              | 1            | -            | -            | 25           |
| 12    | 1-iodoisoquinoline ( <b>18</b> ) | 24             | 1            | -            | -            | 100          |
| 13    | 6-iodoquinoline ( <b>19</b> )    | 2              | 1            | 80           | 83           | 7            |
| 14    | 6-iodoquinoline ( <b>19</b> )    | 6              | 1            | 100          | 100          | 14           |
| 15    | 6-iodoquinoline ( <b>19</b> )    | 24             | 1            | -            | 100          | 67           |

a) Reaction conditions: 0.5 mmol of substrate, 0.75 mmol of morpholine, 0.0125 mmol of Pd(OAc)<sub>2</sub>, 0.0125 mmol of XantPhos, 0.25 mL of triethylamine and 5 mL of solvent under 1 bar of CO.

b) The conversion was determined by GC using dodecane as an internal standard.

**Table S6:** Palladium-catalyzed aminocarbonylation of iodobenzene (**1**) with different primary and secondary amines (**a-h**).

| Product                                                                                               | MS m/z (rel. int.)                                                                   |                                                                                                    |
|-------------------------------------------------------------------------------------------------------|--------------------------------------------------------------------------------------|----------------------------------------------------------------------------------------------------|
| 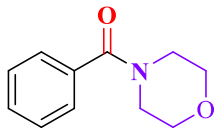 <p><b>1aa</b></p>   |    | 191 (10, M <sup>+</sup> ), 190 (35), 176 (9), 105 (100), 86 (15), 77 (42), 56 (14), 51 (10)        |
|  <p><b>1ab</b></p>   |    | 219 (3, M <sup>+</sup> ), 114 (18), 105 (100), 86 (5), 77 (26), 70 (27), 51 (6), 42 (6)            |
|  <p><b>1ba</b></p>   |   | 177 (12, M <sup>+</sup> ), 162 (19), 122 (14), 105 (100), 77 (30), 73 (4), 51 (7)                  |
|  <p><b>1ca</b></p> |  | 175 (34, M <sup>+</sup> ), 174 (26), 146 (13), 105 (100), 77 (52), 70 (4), 56 (2), 51 (11), 43 (3) |
|  <p><b>1da</b></p> |  | 203 (25, M <sup>+</sup> ), 160 (4), 122 (85), 105 (100), 79 (15), 77 (42), 67 (4), 51 (7), 41 (3)  |
|  <p><b>1ea</b></p> |  | 197 (31, M <sup>+</sup> ), 106 (8), 105 (100), 77 (46), 65 (3), 51 (10)                            |
|  <p><b>1fa</b></p> |  | 207 (1.68, M <sup>+</sup> ), 148 (43), 106 (8), 105 (100), 77 (30), 51 (8)                         |

|                                                                                                     |                                                                                    |                                                                                                            |
|-----------------------------------------------------------------------------------------------------|------------------------------------------------------------------------------------|------------------------------------------------------------------------------------------------------------|
| 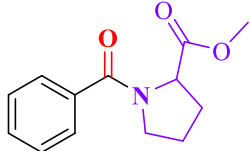 <p><b>1ga</b></p> |  | <p>233 (3, M<sup>+</sup>), 174 (34), 128 (2), 106 (8), 105 (100), 77 (27), 51 (5), 41 (2)</p>              |
|  <p><b>1ha</b></p> |  | <p>212 (53, M<sup>+</sup>), 213 (8), 211 (14), 107 (16), 106 (10), 105 (100), 77 (49), 51 (11), 39 (2)</p> |



**Table S7:** Palladium-catalyzed aminocarbonylation of *para*-substituted iodobenzene derivatives (2-9) with morpholine (a).

| Product                                                                                               | MS m/z (rel. int.)                                                                   |                                                                                                                                            |
|-------------------------------------------------------------------------------------------------------|--------------------------------------------------------------------------------------|--------------------------------------------------------------------------------------------------------------------------------------------|
| 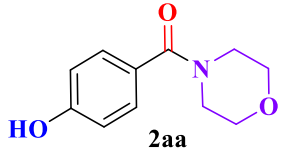 <p><b>2aa</b></p>   |    | 207 (9, M <sup>+</sup> ), 206 (25), 192 (2), 179 (2), 122 (8), 121 (100), 93 (14), 86 (13), 65 (11), 56 (4), 39 (4)                        |
|  <p><b>3aa</b></p>   |    | 221 (9, M <sup>+</sup> ), 220 (20), 193 (2), 135 (100), 107 (10), 92 (7), 77 (12), 64 (3), 56 (2)                                          |
|  <p><b>4aa</b></p>   |   | 205 (8, M <sup>+</sup> ), 204 (22), 190 (9), 193 (2), 120 (9), 119 (100), 91 (29), 86 (6), 65 (10), 56 (4), 39 (2)                         |
|  <p><b>5aa</b></p> |  | 209 (8, M <sup>+</sup> ), 208 (25), 194 (7), 124 (8), 123 (100), 95 (31), 86 (11), 75 (9), 56 (14), 42 (2)                                 |
|  <p><b>6aa</b></p> |  | 270 / 268 (49 / 48 M <sup>+</sup> ), 256 / 254 (10), 185 / 183 (99 / 100), 157 / 155 (24 / 25), 104 (9), 86 (35), 76 (26), 56 (38), 42 (9) |
|  <p><b>7aa</b></p> |  | 249 (16, M <sup>+</sup> ), 248 (40), 234 (19), 218 (14), 190 (5), 163 (100), 135 (24), 103 (15), 86 (23), 76 (10), 56 (22), 42 (3)         |
|  <p><b>8aa</b></p> |  | 259 (17, M <sup>+</sup> ), 258 (45), 244 (21), 216 (6), 173 (100), 145 (58), 125 (6), 95 (10), 86 (27), 72 (10), 56 (47), 42 (6)           |

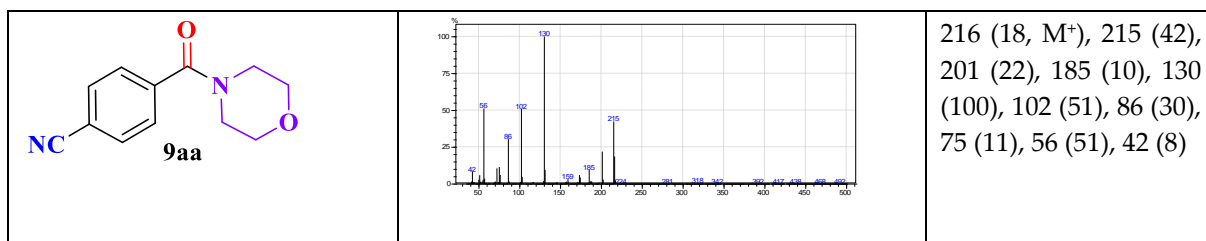

**Table S8:** Palladium-catalyzed aminocarbonylation of substituted iodobenzenes (**10-14**) with morpholine (**a**).

| Product                                                                                                | MS m/z (rel. int.)                                                                   |                                                                                                                               |
|--------------------------------------------------------------------------------------------------------|--------------------------------------------------------------------------------------|-------------------------------------------------------------------------------------------------------------------------------|
| 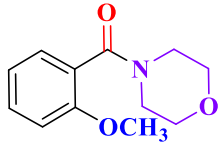 <p><b>10aa</b></p>   |    | 221 (6, M <sup>+</sup> ), 220 (14), 136 (9), 135 (100), 92 (7), 87 (17), 77 (18), 51 (2)                                      |
|  <p><b>11aa</b></p>   |    | 205 (10, M <sup>+</sup> ), 204 (26), 190 (11), 119 (100), 91 (39), 86 (10), 65 (12), 56 (6)                                   |
|  <p><b>12aa</b></p>   |   | 216 (17, M <sup>+</sup> ), 215 (44), 201 (24), 185 (11), 130 (100), 102 (52), 86 (33), 75 (12), 56 (52), 42 (8)               |
|  <p><b>13aa</b></p> |  | 327 (15, M <sup>+</sup> ), 326 (21), 312 (26), 296 (12), 241 (100), 213 (40), 163 (9), 86 (23), 72 (12), 56 (54), 42 (9)      |
|  <p><b>14aa</b></p> |  | 281 (35, M <sup>+</sup> ), 282 (6), 280 (13), 266 (4), 196 (21), 195 (100), 167 (7), 152 (6), 122 (4), 77 (4), 66 (3), 53 (2) |

**Table S9:** Palladium-catalyzed aminocarbonylation of iodoheteroaromatic substrates (**15-19**) with morpholine (**a**)

| Product                                                                                                | MS m/z (rel. int.)                                                                   |                                                                                                                       |
|--------------------------------------------------------------------------------------------------------|--------------------------------------------------------------------------------------|-----------------------------------------------------------------------------------------------------------------------|
| 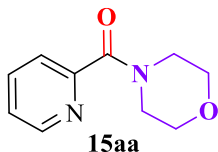 <p><b>15aa</b></p>   |    | 192 (14, M <sup>+</sup> ), 134 (4), 106 (22), 86 (100), 79 (42), 78 (40), 56 (10), 51 (11), 42 (4)                    |
|  <p><b>16aa</b></p>   |    | 192 (16, M <sup>+</sup> ), 191 (52), 177 (22), 149 (10), 106 (100), 86 (33), 78 (63), 56 (48), 51 (23)                |
|  <p><b>17aa</b></p>   |    | 197 (9, M <sup>+</sup> ), 182 (8), 164 (20), 155 (4), 111 (100), 86 (14), 83 (8), 56 (17), 39 (12)                    |
|  <p><b>18aa</b></p>  |   | 242 (24, M <sup>+</sup> ), 157 (12), 156 (11), 143 (5), 129 (100), 128 (45), 101 (14), 86 (39), 77 (6), 56 (5)        |
|  <p><b>19aa</b></p> |  | 242 (24, M <sup>+</sup> ), 241 (33), 227 (4), 200 (7), 156 (100), 157 (13), 101 (17), 86 (12), 77 (7), 75 (5), 56 (8) |
